# Supplementary material
Source: PubMed Central journal article supplement (PMC7365352)
Supplement: NIHMS1576402-supplement-suppl_table_1.pdf [file NIHMS1576402-supplement-suppl_table_1.pdf]

**Supplementary Table 1. Multivariable<sup>1</sup> adjusted geometric mean and 95% confidence interval (95% CI) of absolute nondense breast volume (ANDBV) (cm<sup>3</sup>) according to quartiles of intakes of carbohydrates in early adulthood**

| Quartiles of intake      | Early adulthood (N = 176) |                        |
|--------------------------|---------------------------|------------------------|
|                          | Median intake             | ANDBV mean<br>(95% CI) |
| Total carbohydrates, g/d |                           |                        |
| Q1                       | 176.2                     | 250.1 (200.5-311.9)    |
| Q2                       | 204.2                     | 282.7 (250.6-318.8)    |
| Q3                       | 228.9                     | 306.9 (247.2-381.1)    |
| Q4                       | 249.2                     | 318.3 (276.0-367.2)    |
| $P_{\text{trend}}^2$     |                           | 0.01                   |
| Glycemic index           |                           |                        |
| Q1                       | 79.0                      | 285.3 (243.4-334.3)    |
| Q2                       | 84.7                      | 296.1 (266.7-328.7)    |
| Q3                       | 89.1                      | 302.6 (264.9-345.6)    |
| Q4                       | 95.0                      | 270.2 (241.5-302.4)    |
| $P_{\text{trend}}^2$     |                           | 0.67                   |
| Glycemic load            |                           |                        |
| Q1                       | 142.7                     | 251.5 (209.5-301.9)    |
| Q2                       | 164.8                     | 299.7 (263.6-340.7)    |
| Q3                       | 183.3                     | 318.6 (286.1-354.9)    |
| Q4                       | 209.7                     | 287.5 (241.7-342.0)    |
| $P_{\text{trend}}^2$     |                           | 0.30                   |
| Fiber, g/d               |                           |                        |
| Q1                       | 9.0                       | 260.4 (235.0-288.6)    |
| Q2                       | 12.3                      | 271.5 (203.8-361.6)    |
| Q3                       | 15.8                      | 281.8 (252.7-314.3)    |
| Q4                       | 22.3                      | 346.6 (286.9-418.6)    |
| $P_{\text{trend}}^2$     |                           | 0.04                   |
| Fructose, g/d            |                           |                        |
| Q1                       | 8.2                       | 275.2 (238.2-317.8)    |
| Q2                       | 14.1                      | 287.5 (251.1-329.1)    |
| Q3                       | 19.6                      | 309.0 (275.5-346.7)    |
| Q4                       | 30.4                      | 282.5 (258.7-308.5)    |
| $P_{\text{trend}}^2$     |                           | 0.73                   |
| Sucrose, g/d             |                           |                        |
| Q1                       | 19.1                      | 314.2 (258.3-382.2)    |
| Q2                       | 29.2                      | 253.8 (229.2-281.0)    |
| Q3                       | 40.8                      | 283.5 (245.2-327.8)    |
| Q4                       | 57.0                      | 305.5 (250.6-372.3)    |
| $P_{\text{trend}}^2$     |                           | 0.85                   |

Abbreviation: NA, not available

<sup>1</sup> Geometric means and 95% CI are estimated from linear mixed effects models including clinic as a random effect and including treatment group (diet intervention group and usual care-control group), childhood BMI z-score, current adult percent body fat from DXA (%), continuous), number of live births (0 and >0), duration of hormone use (yrs, continuous), race (White and non-White), education (bachelor's degree, graduate school and other), status of smoking (never, former and current), alcohol consumption (never/former, <3 drinks/week, 3-<6 drinks/week, 6-<10 drinks/week, ≥10 drinks/week), and total energy intake (kcal/day, continuous) as fixed effects.

<sup>2</sup> P-test for trend was conducted by modeling the quartile medians of each dietary intake as a continuous term in linear mixed effects models and calculating the Wald test statistic.
