# Supplementary material
Source: PubMed Central journal article supplement (PMC7365352)
Supplement: NIHMS1576402-supplement-suppl_table_2.pdf [file NIHMS1576402-supplement-suppl_table_2.pdf]

**Supplementary table 2. Multivariable1 adjusted geometric mean and 95% confidence interval (95% CI) of absolute nondense breast volume (ADBV) (cm<sup>3</sup>) according to quartiles of intakes of carbohydrates in adolescence**

| Quartiles of intake      | Adolescence (N= 178) |                        | By menarcheal status    |                        |                        |                        |
|--------------------------|----------------------|------------------------|-------------------------|------------------------|------------------------|------------------------|
|                          | Median intake        | ANDBV mean<br>(95% CI) | Before menarche (N=161) |                        | After menarche (N=163) |                        |
|                          |                      |                        | Median intakes          | ANDBV mean<br>(95% CI) | Median intakes         | ANDBV mean<br>(95% CI) |
| Total carbohydrates, g/d |                      |                        |                         |                        |                        |                        |
| Q1                       | 203.1                | 335.0 (293.0-383.0)    | 189.2                   | 294.6 (253.7-342.0)    | 206.5                  | 315.0 (252.3-393.2)    |
| Q2                       | 217.9                | 266.4 (226.9-312.8)    | 213.4                   | 324.9 (287.8-367.9)    | 228.5                  | 294.8 (255.1-340.6)    |
| Q3                       | 232.4                | 277.6 (239.0-322.5)    | 228.1                   | 263.6 (228.2-304.4)    | 246.0                  | 257.2 (236.2-280.1)    |
| Q4                       | 245.7                | 276.0 (239.1-318.5)    | 244.3                   | 277.2 (261.7-293.6)    | 267.9                  | 305.3 (246.0-378.9)    |
| $P_{trend}^2$            |                      | 0.19                   |                         | 0.31                   |                        | 0.70                   |
| Fiber, g/d               |                      |                        |                         |                        |                        |                        |
| Q1                       | 8.2                  | 293.0 (254.9-336.9)    | 7.4                     | 314.3 (274.1-360.4)    | 7.9                    | 267.6 (232.6-308.0)    |
| Q2                       | 9.7                  | 279.3 (223.2-349.5)    | 9.2                     | 283.1 (242.3-330.8)    | 9.6                    | 292.5 (250.8-341.2)    |
| Q3                       | 10.9                 | 269.2 (233.9-309.8)    | 10.6                    | 264.0 (237.5-293.6)    | 11.3                   | 282.3 (227.4-350.5)    |
| Q4                       | 12.9                 | 311.5 (282.5-343.4)    | 13.0                    | 297.2 (267.5-330.2)    | 14.3                   | 330.4 (281.0-388.5)    |
| $P_{trend}^2$            |                      | 0.23                   |                         | 0.55                   |                        | 0.14                   |
| Fructose , g/d           |                      |                        |                         |                        |                        |                        |
| Q1                       | 16.1                 | 282.2 (246.9-322.5)    | 12.6                    | 274.8 (233.5-323.3)    | 14.9                   | 294.5 (251.5-344.9)    |
| Q2                       | 21.9                 | 269.1 (234.0-309.5)    | 18.1                    | 287.3 (245.7-335.8)    | 24.0                   | 294.3 (259.6-333.7)    |
| Q3                       | 26.2                 | 296.5 (239.9-366.6)    | 23.4                    | 302.3 (249.6-366.1)    | 30.2                   | 269.1 (234.8-308.6)    |
| Q4                       | 32.7                 | 304.3 (272.2-340.3)    | 35.3                    | 293.6 (260.5-331.0)    | 39.9                   | 312.6 (270.1-361.8)    |
| $P_{trend}^2$            |                      | 0.04                   |                         | 0.23                   |                        | 0.63                   |
| Sucrose , g/d            |                      |                        |                         |                        |                        |                        |
| Q1                       | 34.1                 | 324.8 (289.2-364.7)    | 31.2                    | 296.8 (264.5-333.0)    | 30.3                   | 281.2 (221.9-356.4)    |
| Q2                       | 41.2                 | 279.9 (246.4-318.0)    | 40.9                    | 292.2 (256.3-333.1)    | 38.2                   | 354.0 (283.3-442.4)    |
| Q3                       | 46.5                 | 285.3 (225.8-360.7)    | 50.0                    | 286.0 (246.8-331.6)    | 46.0                   | 286.4 (254.9-321.9)    |
| Q4                       | 55.3                 | 263.6 (243.9-284.8)    | 60.0                    | 281.9 (245.8-323.2)    | 55.5                   | 254.5 (230.2-281.3)    |
| $P_{trend}^2$            |                      | 0.005                  |                         | 0.53                   |                        | 0.16                   |

Abbreviation: NA, not available

1 Geometric means and 95% CI are estimated from linear mixed effects models including clinic as a random effect and including treatment group (diet intervention group and usual care-control group), childhood BMI z-score, current adult percent body fat from DXA (% , continuous), number of live births (0 and >0), duration of hormone use (yrs, continuous), race (White and non-White), education (bachelor's degree, graduate school and other), status of smoking (never, former and current), alcohol consumption (never/former, <3 drinks/week, 3-<6 drinks/week, 6-<10 drinks/week, ≥10 drinks/week), and total energy intake (kcal/day, continuous) as fixed effects.

2 P-test for trend was conducted by modeling the quartile medians of each dietary intake as a continuous term in linear mixed effects models and calculating the Wald test statistic.
